# Supplementary material for: Long-Term Fluoxetine Administration Causes Substantial Lipidome Alteration of the Juvenile Macaque Brain
Source: MDPI journal article supplement (doi:10.3390/ijms22158089), 2021-07-28
Supplement: s1 [file s1]

# Long-term fluoxetine administration causes substantial lipidome alteration of the juvenile macaque brain

Anna Tkachev<sup>1,2,§</sup>, Elena Stekolshchikova<sup>1,§</sup>, Daniil M. Bobrovskiy<sup>3</sup>, Nickolay Anikanov<sup>1</sup>, Polina Ogurtsova<sup>1</sup>, Dong Ik Park<sup>4,#</sup>, Anja K.E. Horn<sup>5</sup>, Daria Petrova<sup>1</sup>, Ekaterina Khrameeva<sup>2,\*</sup>, Mari S. Golub<sup>6,\*</sup>, Christoph W. Turck<sup>4,\*</sup>, Philipp Khaitovich<sup>1,\*</sup>

<sup>1</sup> Center for Neurobiology and Brain Restoration, Skolkovo Institute of Science and Technology, Moscow, 121205, Russia

<sup>2</sup> Center of Life Sciences, Skolkovo Institute of Science and Technology, Moscow, 121205, Russia

<sup>3</sup> Faculty of Bioengineering and Bioinformatics, Moscow State University, Moscow 119234, Russia

<sup>4</sup> Max Planck Institute of Psychiatry, Munich, Germany

<sup>5</sup> Ludwig Maximilians University, Department I, Institute of Anatomy and Cell Biology, Munich, Germany

<sup>6</sup> California National Primate Research Center, University of California, Davis, CA, USA

§ Contributed equally

\* Correspondence should be addressed to: e.khrameeva@skoltech.ru, msgolub@ucdavis.edu, turck@psych.mpg.de, and khaitovich@eva.mpg.de

# Present address:

Aarhus University, Department of Biomedicine, Ole Worms Allé 3, 8000 Aarhus C, Denmark

**Supplementary Table S1.**

Sample information

**Supplementary Table S2.**

Gene expression table

**Supplementary Table S3.**

Table of polar metabolite abundances

**Supplementary Table S4.**

Table of lipid abundances

**Supplementary Table S5.**

Polar metabolite information, including annotation and p-values for t-test of fluoxetine vs control groups.

**Supplementary Table S6.**

Lipid information, including annotation and p-values for t-test of fluoxetine vs control groups

**Supplementary Table S7.**

Gene information, including p-values for t-test of fluoxetine vs control groups

**Supplementary Table S8.**

Results for lipid class analysis (Gene Set Enrichment Analysis method)

**Supplementary Table S9.**

Table of lipid enzymes corresponding to the lipid classes

**Supplementary Table S10.**

Gene Set Enrichment Analysis (GSEA) results for gene expression

**Supplementary Table S11.**

Table of links from KEGG compounds to LMSD identifiers.
